# Supplementary material for: A cis-regulatory sequence of the selector gene vestigial drives the evolution of wing scaling in Drosophila species
Source: Oxford University Press journal article supplement (doi:10.1242/jeb.244692), 2023-04-20
Supplement: jeb244692supp.pdf [file jeb244692supp.pdf]

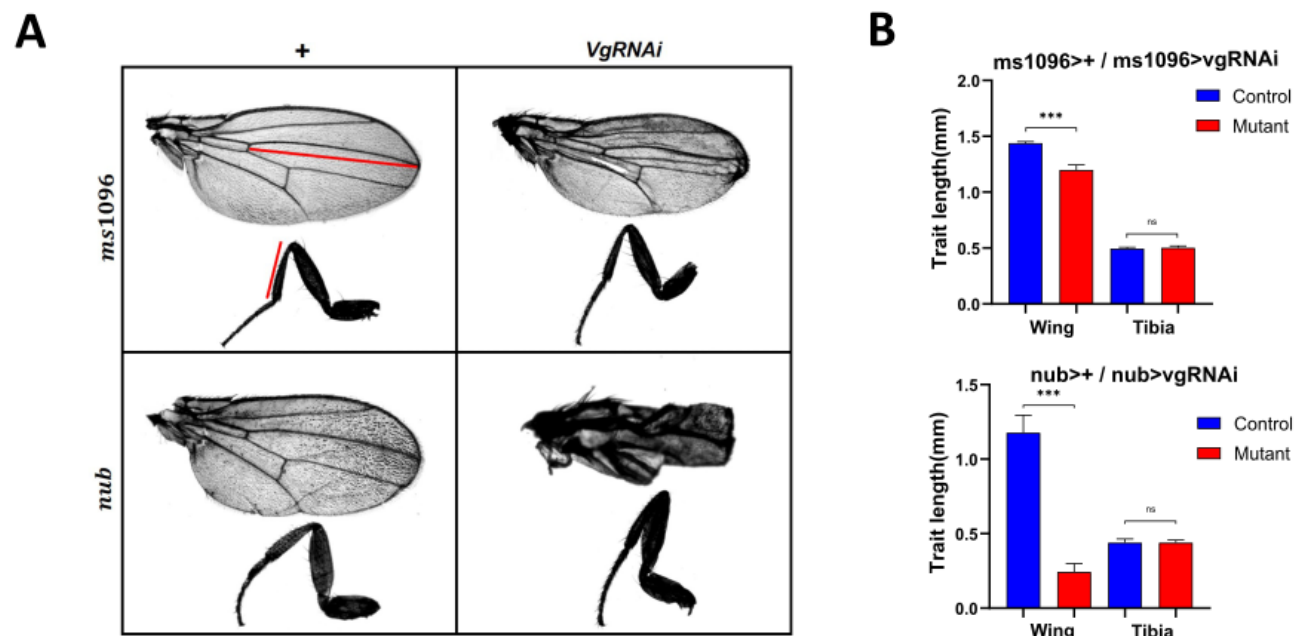

**Fig. S1. Legs are not affected by changes in *vg* expression** (A) Wing and tibia phenotypes of *D. melanogaster* flies expressing a *vg*RNAi under the control of *ms1096*Gal4 or *nub*Gal4 compared to the corresponding controls (*ms1096*>+ or *nub*>+, respectively). P/D lengths in wings and tibiae were taken to determine wing/tibia scaling relationships in Fig. 2, S2, 4, S4 (red lines). (B) Quantification of tibia and wing P/D lengths of the genotypes shown in A. Mutants (red bars) correspond to the *vg*RNAi-expressing flies. Statistical comparisons correspond to Student t-tests. \*\*\*= $p$ -value<0.001, ns = not statistically significant ( $p$ -value>0.05). *ms1096*>VgRNAi,  $n$ = 13; *ms1096*>+,  $n$ = 10; *nub*>VgRNAi,  $n$ = 9; *nub*>+,  $n$ = 7.

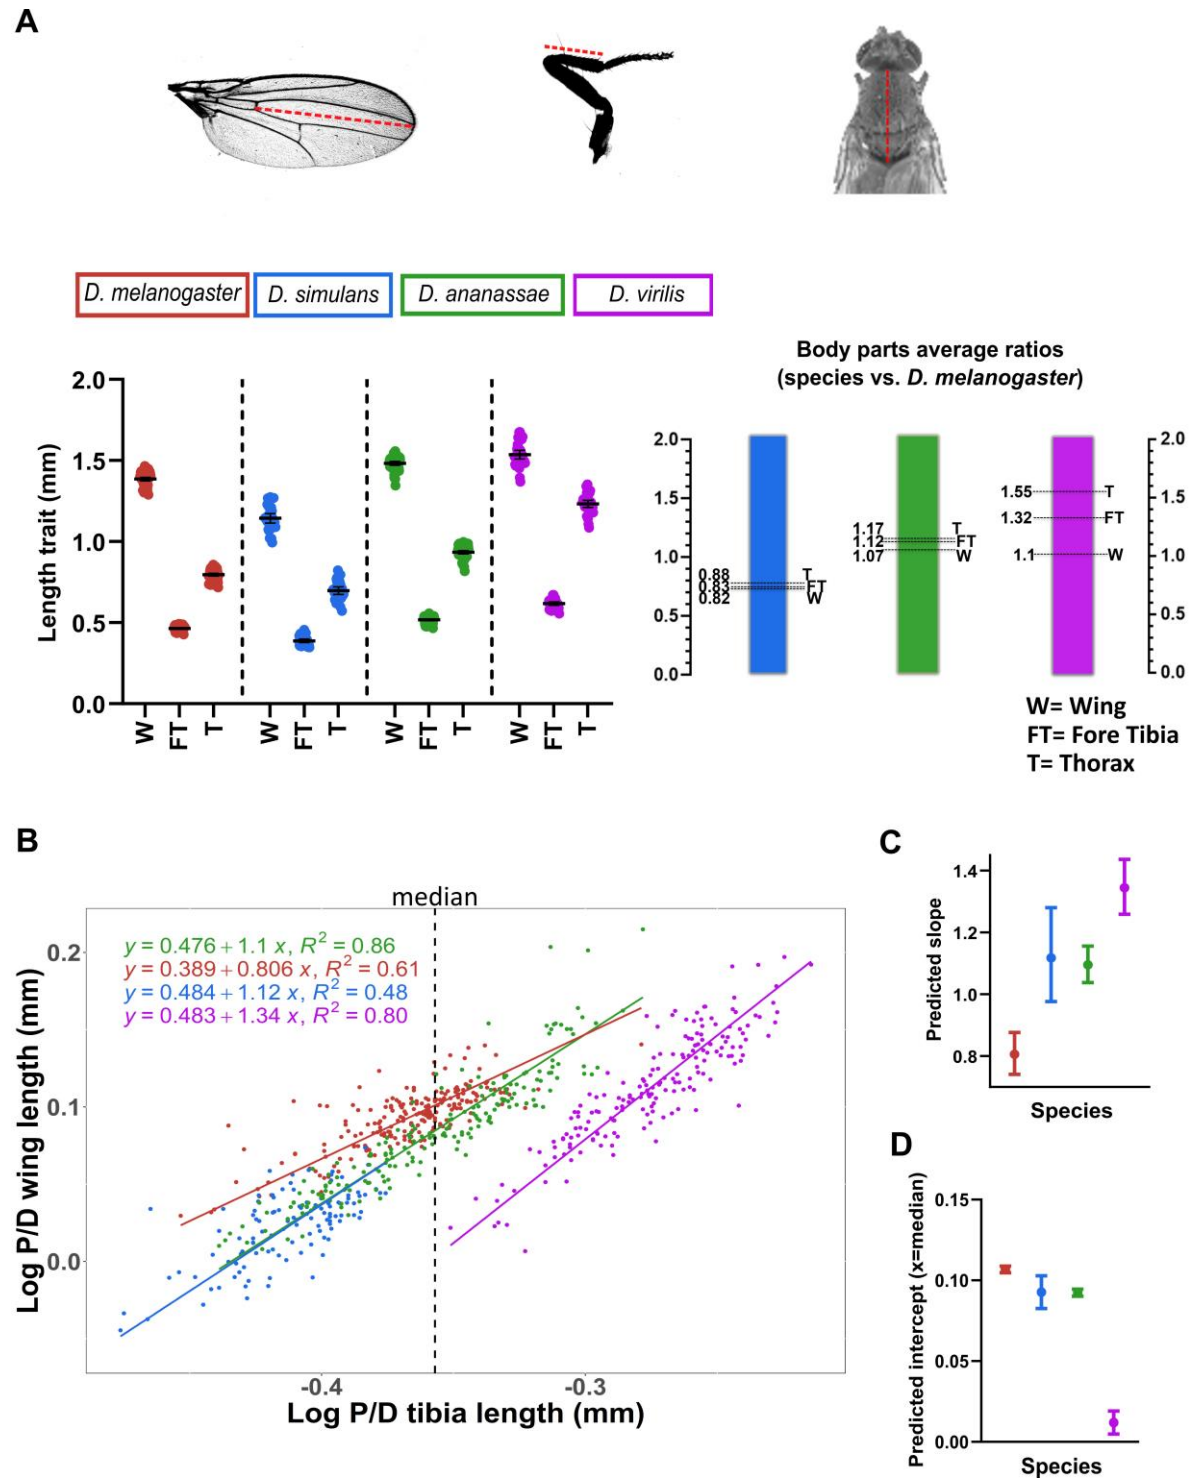

**Fig. S2. Wing-to-tibia scaling relationships reveal a reduction of wing size in *D. virilis* males.** (A) P/D trait measures in *Drosophila* species. Average length of left/right wings and fore tibias, as well as thorax measures are represented for each male flies. Right panel shows the body parts average ratios (species vs. *D. melanogaster*) for each measured trait. *D. melanogaster*  $n=60$ , *D. simulans*  $n=30$ , *D. ananassae*  $n=58$ , *D. virilis*  $n=34$ . (B) Wing-to-tibia static scaling relationships fitted using model II of regression (SMA) in male *Drosophila*. Red, blue, green and purple dots correspond to *D. melanogaster*, *D. simulans*, *D. ananassae* and *D. virilis* respectively. (C) Predicted slope of wing-tibia scaling relationship for each *Drosophila* species. (D) Predicted intercept of wing-tibia scaling relationship for each *Drosophila* species. The predicted intercept value was obtained through SMA adjusted to the median  $\log(\text{tibia})$  of all species (dotted line in panel B). Error bars are 95% confidence intervals. The experiment was replicated two times in the laboratory. *D. melanogaster*,  $n=215$ ; *D. simulans*,  $n=112$ ; *D. ananassae*,  $n=195$ ; *D. virilis*,  $n=179$ . T=thorax; FT=fore tibia; W=wing.

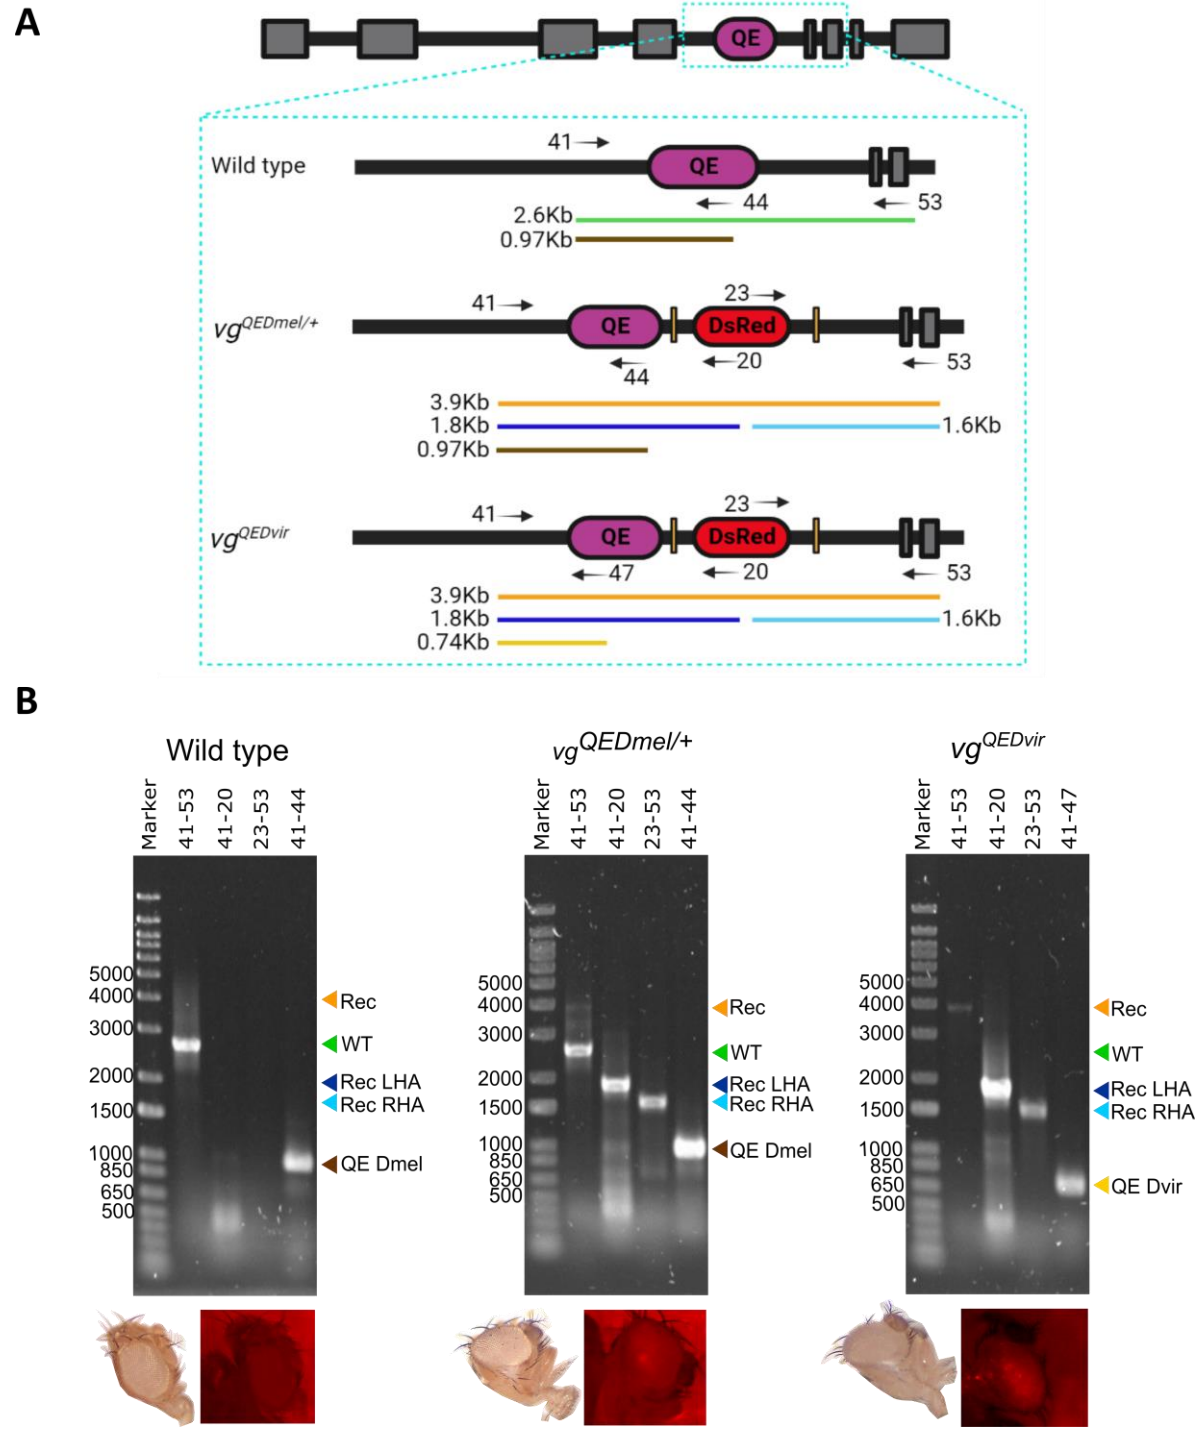

**Fig. S3. Molecular confirmation of the  $vg^{QE}$  replacement.** (A) Size of amplification products used for the identification of the  $vg^{QE}$  replacement are shown in the colored lines. Primers and the sense that were used are indicated with black arrows. (B) Amplification products in wild type,  $vg^{QEDmel/+}$ , and  $vg^{QEDvir}/vg^{QEDvir}$  flies. We used oligos 41 and 53 (see Table S1) for the evaluation of the Recombinant (Rec) and/or the wild-type (WT) product; oligos 41 and 20 (see Table S1) were used for the identification of the Recombinant Left homologous Arm (Rec-LHA); oligos 23 and 53 (see Table S1) were used for the amplification of the Recombinant Right Homologous Arm (RecRHA);  $vg^{QEDmel/+}$ , and  $vg^{QEDvir}/vg^{QEDvir}$  were evaluated with oligos 41 and, 44 or 47 (see Table S1), respectively. At the bottom panels, evidence of fluorescent eyes is shown as a confirmation that the DsRed marker is present.

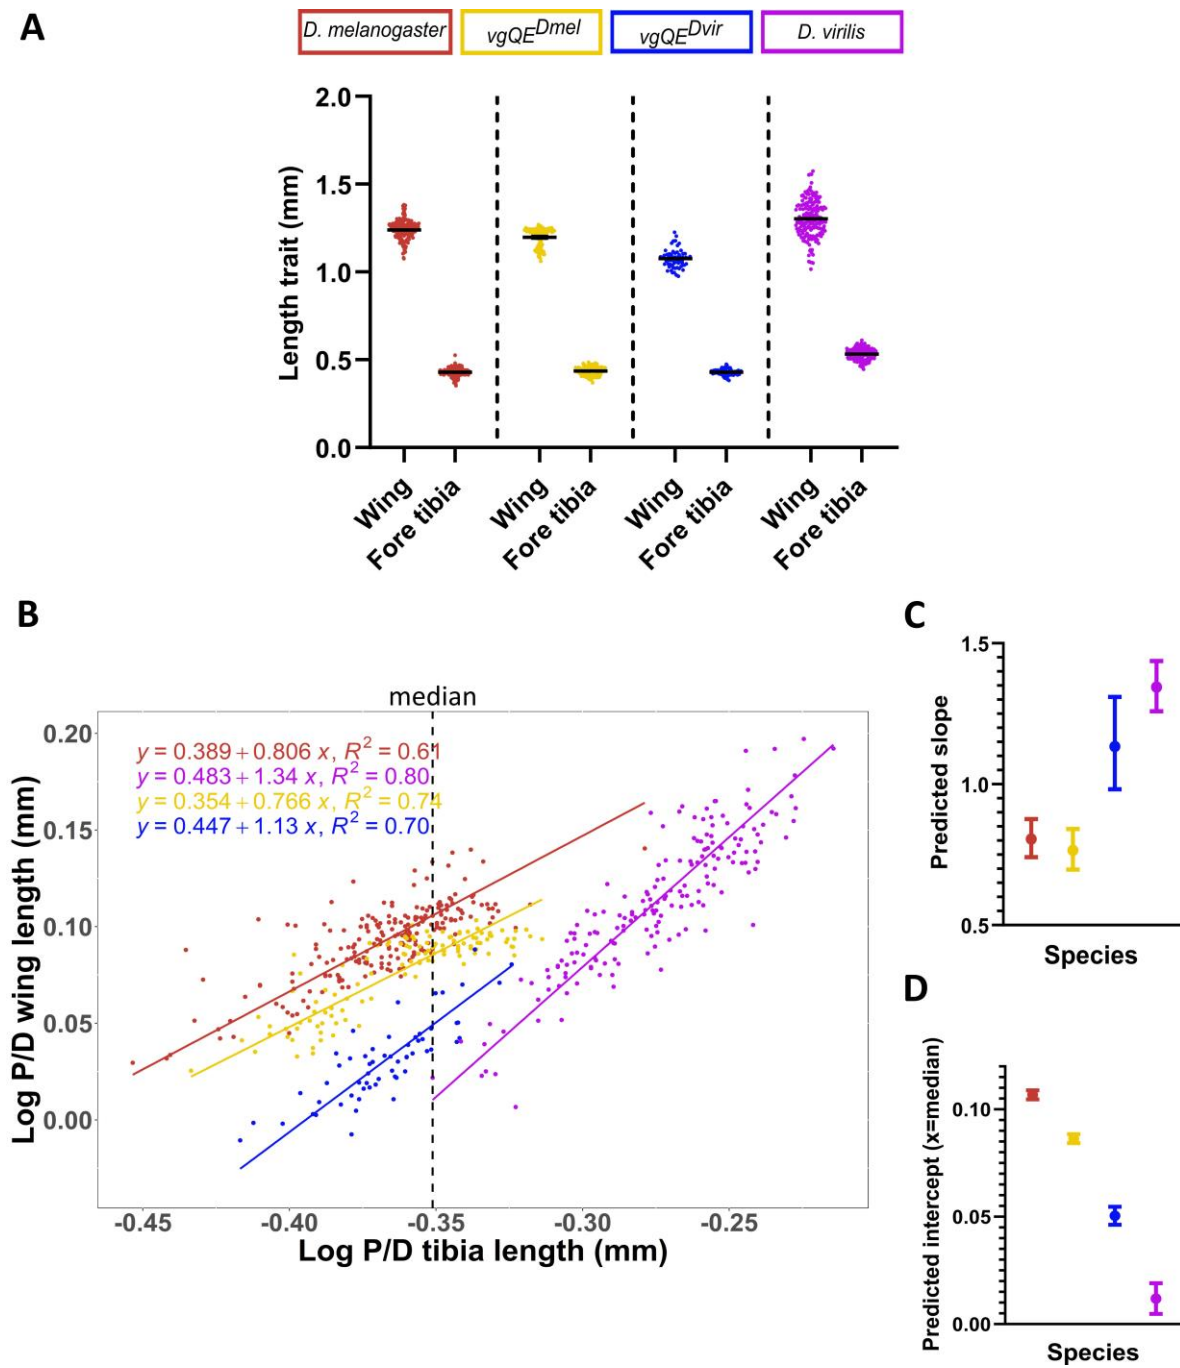

**Fig. S4. *D. virilis*  $vg^{QE}$  replacement into *D. melanogaster* results in allometric changes in males.** (A) Proximal-distal trait measures in *Drosophila* species (*D. melanogaster*, *D. virilis*) and CRISPR/Cas9 mutants ( $vg^{QEDmel}$ ,  $vg^{QEDvir}$ ). Average length of left/right wings and fore tibias are represented for each male flies. (B) Wing-to-tibia static static relationships fitted using model II of regression (SMA).

Yellow and blue lines and dots correspond to HDR replacements using  $vg^{QEDmel}$  and  $vg^{QEDvir}$  respectively. Red and purple lines and dots show the scaling relationship in *D. melanogaster* and *D. virilis* wild type animals respectively. (C) Predicted slope of wing-tibia scaling relationship for *D. melanogaster*, *D. virilis*, and the CRISPR/Cas9 edited stocks. (D) Predicted intercept of wing-tibia scaling relationship for *D. melanogaster*, *D. virilis*, and the CRISPR/Cas9 edited stocks. The predicted intercept value was obtained through SMA adjusted to the overall median log(tibia size) of *D. melanogaster*, *D. virilis* and CRISPR/Cas9 stocks (dotted line in panel B). Error bars are 95% confidence intervals. *D. melanogaster*,  $n=215$ ;  $vg^{QEDmel}$ ,  $n=118$ ;  $vg^{QEDvir}$ ,  $n=59$ ; *D. virilis*,  $n=179$ .

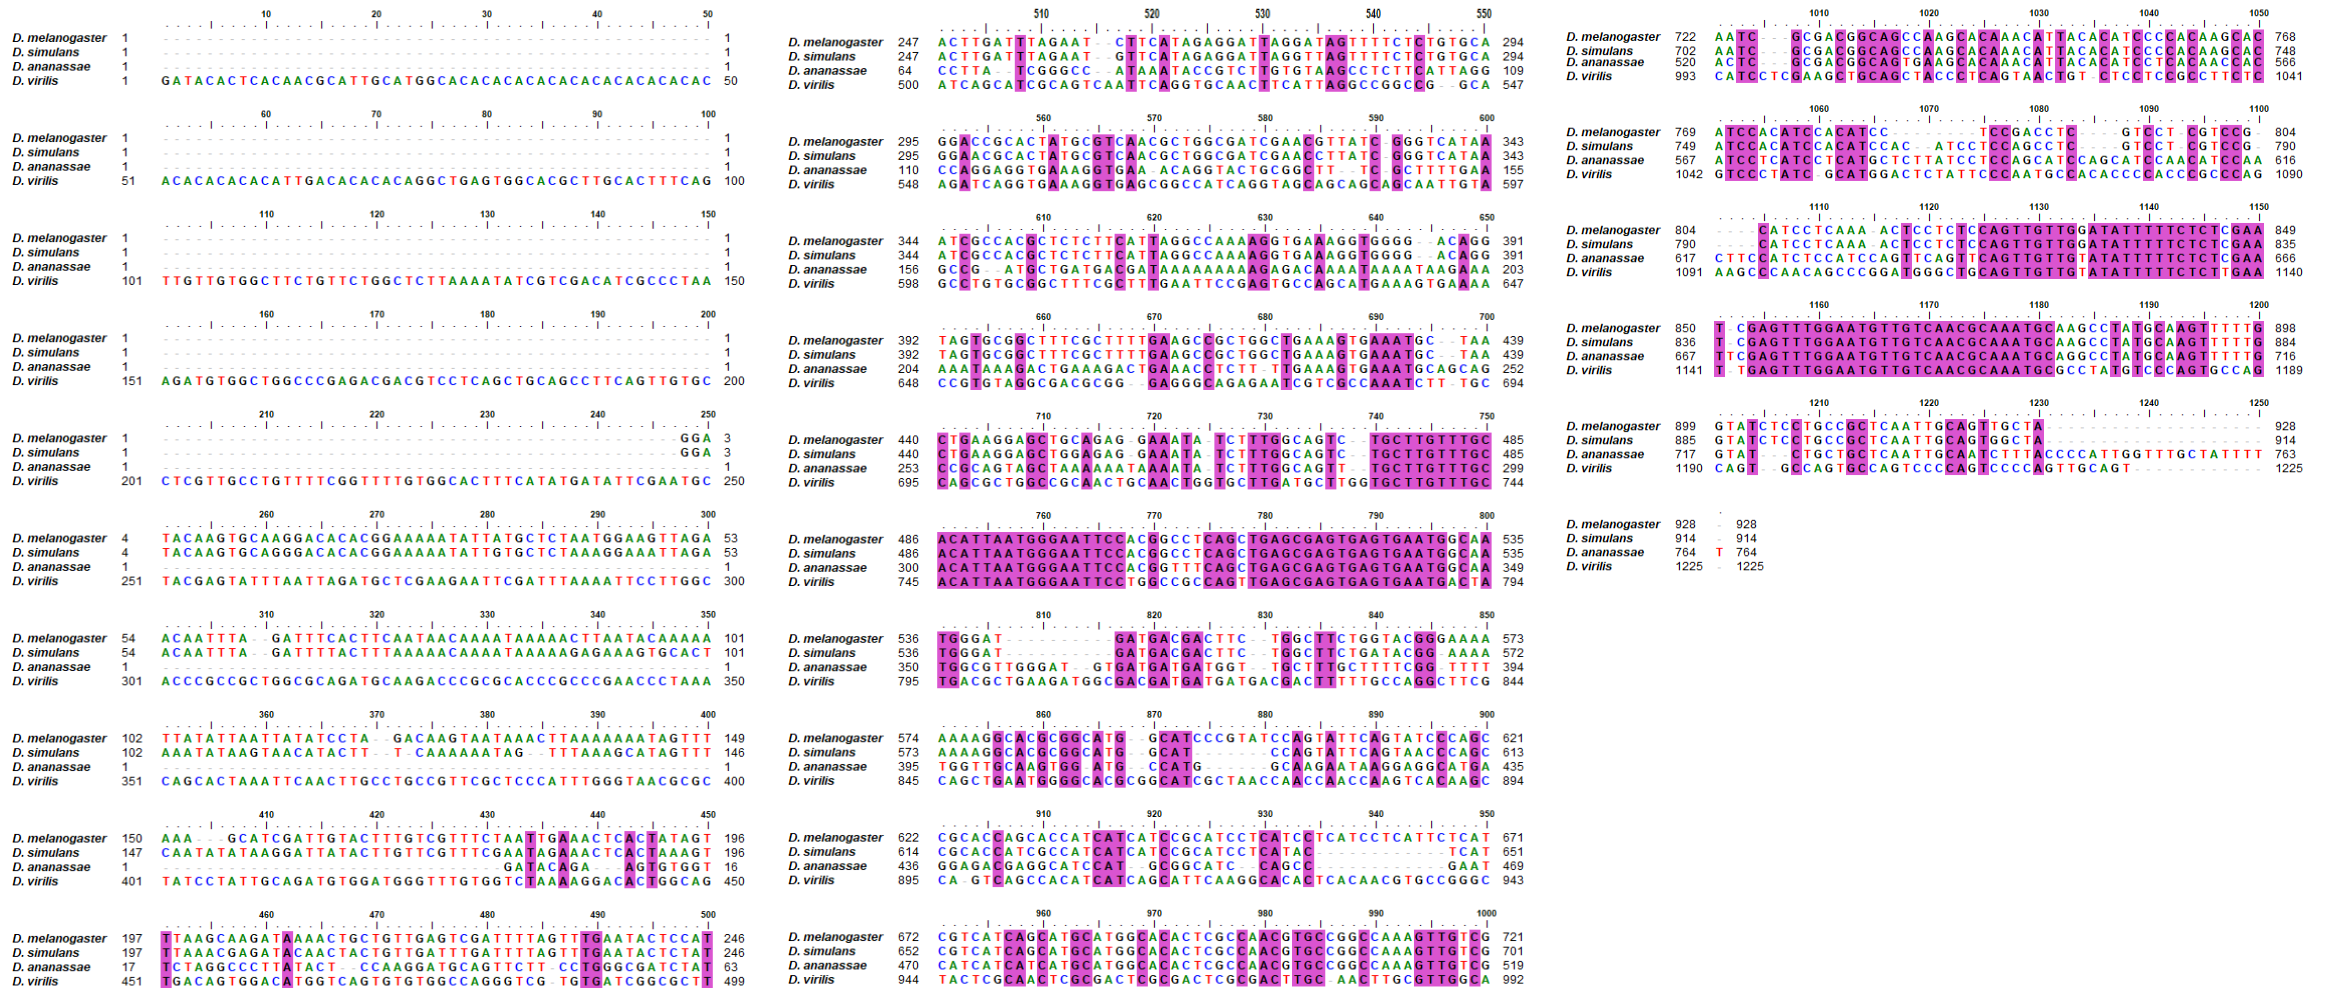

**Fig. S5. Multiple alignment of QE sequences in *Drosophila* species.** Sequences obtained from local alignments using the Smith–Waterman algorithm were processed in Clustal Omega for multiple alignment. Conserved bases in the four species are highlighted in pink.



Table S1. Oligonucleotides

| N°  | Oligo name          | Sequence                                                          |
|-----|---------------------|-------------------------------------------------------------------|
| 2   | QE3'                | GCTATTTCTAGCTCTAAAACCTTATGTGTAATGGAGCTCCCGACGTTAAATTGAAAATAGGTC   |
| 3   | TEA2                | GGAAAGATATCCGGGTGAACCTCGCAGTATGGTGATTGATTGTTTGTAGAGCTAGAAATAGCAAG |
| 20  | mCherry-R           | CTTGGTCACCTTCAGCTTGG                                              |
| 23  | DsRed1C Forward     | GGACATCACCTCCACAACG                                               |
| 41  | RecDsp F            | GCCGCATAGATTCTCATTACG                                             |
| 44  | QE sp R             | CATTCACCTCACTCGCTCAGCTG                                           |
| 47  | QE vir R            | GATTTGGCGACGATTCTCTGC                                             |
| 53  | Outside_screening_R | CGATCGGGCGATCGACTCAC                                              |
| 352 | M13 Forward         | TGTAAAACGACGGCCAGT                                                |
| 596 | pCFD4 upstream seq  | TAGTCCCATCATTGGCATGGTAGGTACCCG                                    |
| 835 | pBR322 fwd          | CAGCTCGAGGCTCTCCGTCATCG                                           |
| 836 | pBR322 rev          | CTAGCATGCAAGAATCCACCTGC                                           |
| 837 | DsRed fwd           | CGGCCGCGGACATATGCACACCTG                                          |
| 838 | DsRed rev           | TGGAGATCTTTACTAGTGCTCTTC                                          |
| 839 | DmLHA2/pBR322 fwd   | GTGGAATTCTTGCATGCTAGGCCACTCGCTTGTCTTTTCGATTC                      |
| 840 | DmLHA2/DsRed rev    | TGTGCATATGTCCGCGCCGTCGAATCACCATACTGCATTTGGTG                      |
| 841 | DmRHA1/DsRed fwd    | AGCACTAGTAAAGATCTCCATAATGGAGATGTCTTGCTCCCGGC                      |
| 842 | DmRHA1/pBR322 rev   | GACGGAAGAGCCTCGAGCTGCCTACAAGCAGATATCCGATTGG                       |
| 843 | DmLHA2 rev          | TCGAATCACCATACTGCATTTGGTG                                         |
| 844 | Dmel/virQE fwd      | AATGCAGTATGGTGATTGACTAGTTGGAATGTGCTAT                             |
| 845 | DmelQE rev          | TGTGCATATGTCCGCGCCGCTGTGTAATGGAGCTCCC                             |
| 846 | DvirQE rev          | TGTGCATATGTCCGCGCCGAGTGTAAATGGAGCTCTG                             |
